# Supplementary material for: Conservation of heat and mass in P-SKRIPS version 1: the coupled atmosphere-ice-ocean model of The Ross Sea
Source: Copernicus journal article supplement (doi:10.5194/egusphere-2022-1135), 2022-11-23
Supplement: Supplementary file 1 [file egusphere-2022-1135-supplement.pdf]

# **Supplements to "Conservation of heat and mass in P-SKRIPS version 1: the coupled atmosphere-ice-ocean model of The Ross Sea"**

Alena Malyarenko<sup>1,2,\*</sup>, Alexandra Gossart<sup>2,\*</sup>, Rui Sun<sup>3</sup>, and Mario Krapp<sup>4,2</sup>

<sup>1</sup>National Institute of Water and Atmospheric Research | Taihoro Nukurangi, 301 Evans Bay Parade, Hataitai, Wellington, New Zealand

<sup>2</sup>Antarctic Research Centre | Te Puna Pātioio, Victoria University of Wellington, CO 549, Cotton Building, Gate 7, Kelburn Parade, Wellington, 6012, New Zealand

<sup>3</sup>Scripps Institution of Oceanography, La Jolla, California, USA

<sup>4</sup>GNS Science | Te Pū Ao, 30 Gracefield Rd, Gracefield, Lower Hutt 5010, New Zealand

\*These authors contributed equally to this work.

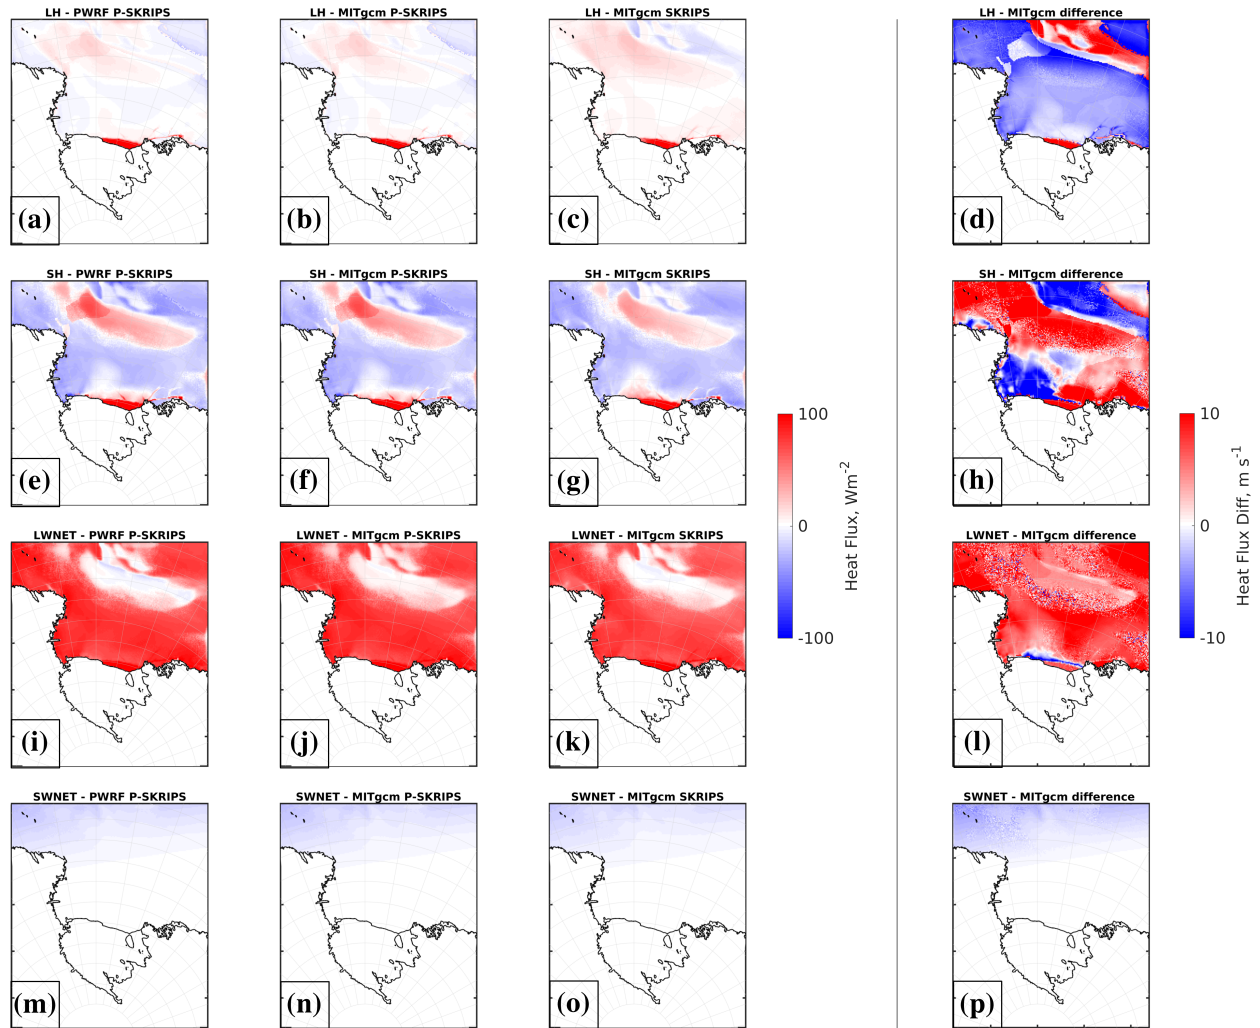

**Fig. S1.** Same as Figure 4, but for August 2016 experiments.

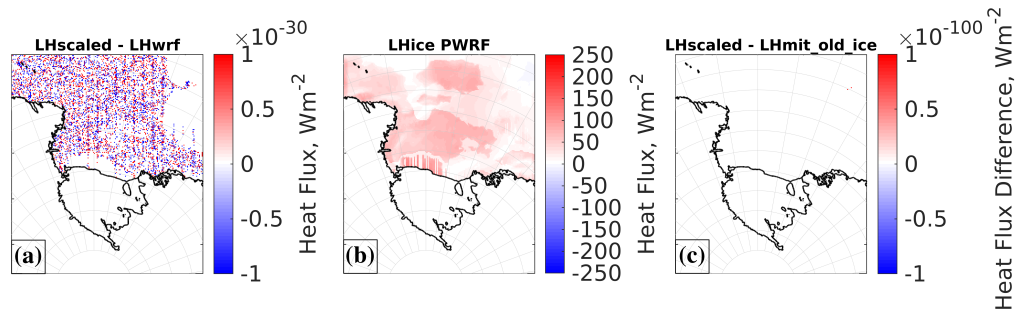

**Fig. S2.** Same as Figure 6, but for August 2016 experiments.

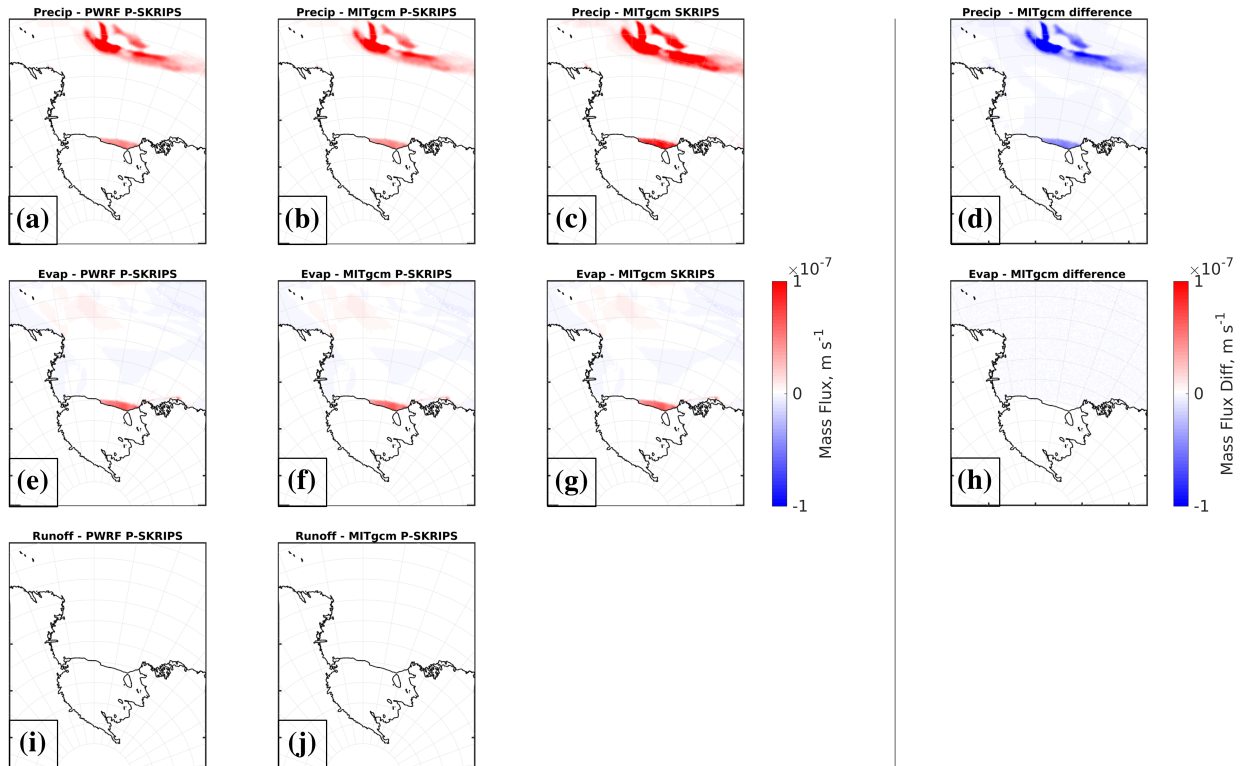

**Fig. S3.** Same as Figure 7, but for August 2016 experiments.

**Table S1.** Import of heat and mass fluxes versus calculations in the two experiments

|      |                | MITgcm exf | MITgcm seaice | PWRF |
|------|----------------|------------|---------------|------|
| HEAT | latent heat    | ↓          | ↑             | ↑    |
|      | sensible heat  | ↓          | ↑             | ↑    |
|      | short wave net | ↑          | ↓             | ↓    |
|      | long wave net  | ↑          | ↑             | ↓    |
|      | TOTAL          | ↑          | ↑             | -    |
| MASS | evaporation    | ↑          | -             | ↑    |
|      | precipitation  | ↓          | -             | ↓    |
|      | sea ice runoff | ↓          | -             | ↓    |
|      | land runoff    | ↓          | -             | ↓    |
|      | TOTAL          |            |               |      |

**Table S2.** Statistics presenting the mean value and biases through the coupling interface in the SKRIPS case. The variables are integrated over the whole simulation and through the entire domain (from Figures 8 and S4)

|                    | January       |              |              | August        |              |              |
|--------------------|---------------|--------------|--------------|---------------|--------------|--------------|
|                    | Mean value    | Mean bias    | Max bias     | Mean value    | Mean bias    | Max bias     |
| Latent heat [W]    | $2.69e^{13}$  | $5.08e^{12}$ | $2.31e^{13}$ | $7.31e^{12}$  | $7.61e^{12}$ | $1.41e^{13}$ |
| Sensible heat [W]  | $1.68e^{13}$  | $9.10e^{12}$ | $5.62e^{13}$ | $-1.61e^{13}$ | $1.51e^{13}$ | $5.13e^{13}$ |
| Long wave net [W]  | $8.88e^{13}$  | $1.71e^{13}$ | $7.03e^{13}$ | $1.16e^{14}$  | $1.34e^{13}$ | $2.49e^{13}$ |
| Short wave net [W] | $-3.94e^{14}$ | $3.64e^{13}$ | $9.48e^{13}$ | $-7.54e^{12}$ | $1.31e^{12}$ | $1.48e^{13}$ |



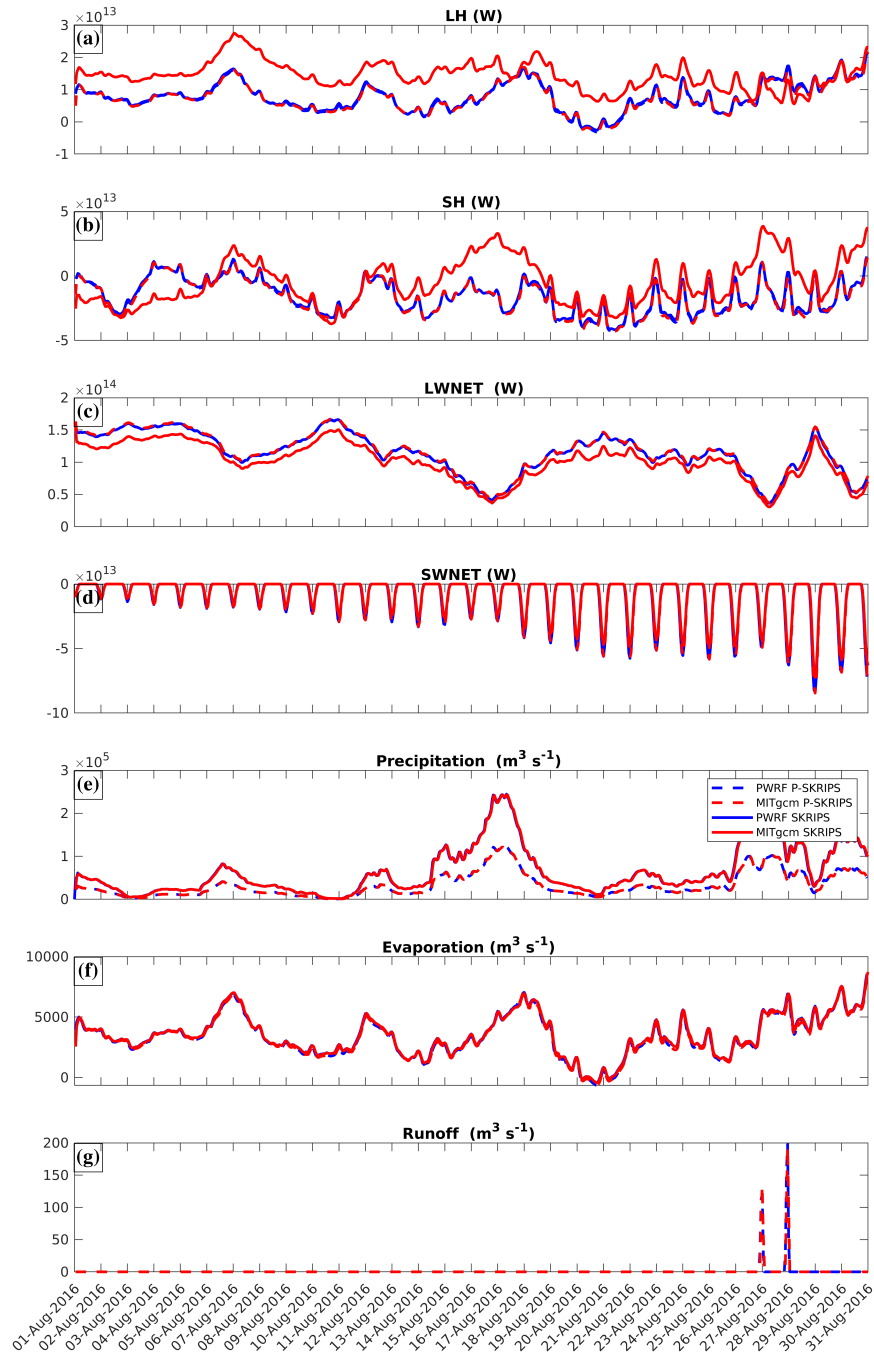

**Fig. S4.** Same as Figure 8, but for August 2016 experiments.
